# Supplementary material for: Active gas replenishment and sensing of the wetting state in a submerged superhydrophobic surface
Source: Royal Society of Chemistry journal article supplement (doi:10.1039/c6sm02820a), 2017-01-01

## Supplementary Information

All electrochemical experiments involving capacitance measurements and evolution of hydrogen had the following experimental setup:

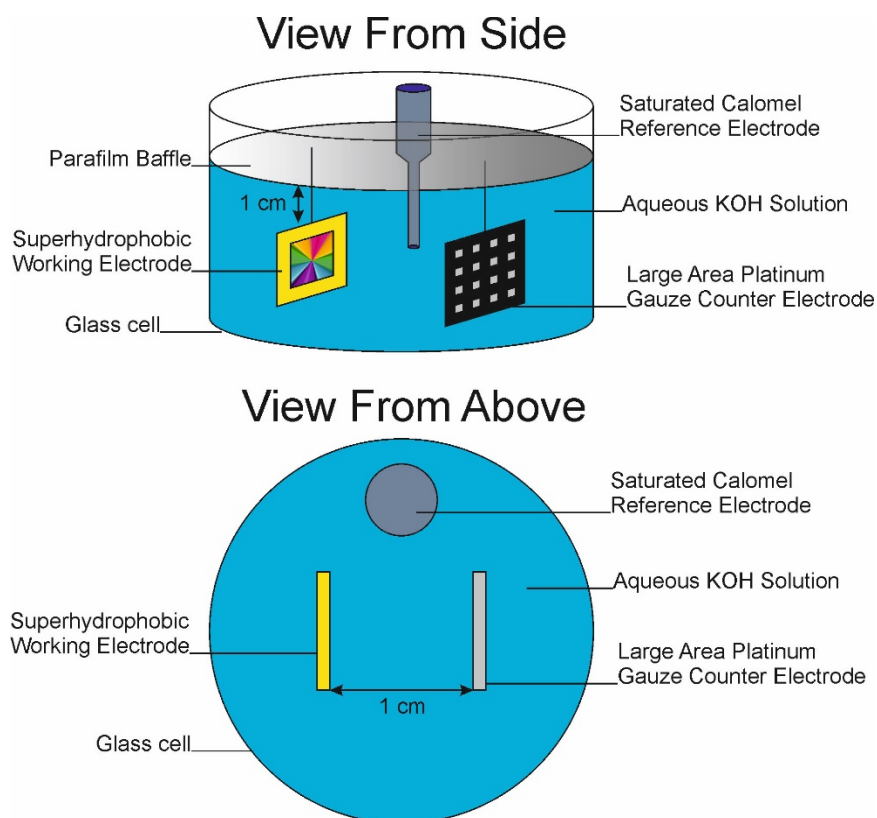

Supplement: c6sm02820a1.pdf [file c6sm02820a1.pdf]
